# Supplementary material
Source: Springer Nature journal article supplement (https://www.springermedizin.de/resource/supplementary/12911_2011_406_MOESM1_ESM.pdf/9525664)
Supplement: MOESM1 [file 9525664]

## Test Script example – Scenario: Elderly man with multiple medical conditions (extract for one feature)

| Short title                               | Step no. | Execution                                                                                                                                                                                    | Expected result                                                                                          | Test criteria                                                                                                                                   | Feature ID | System 1<br>1=present<br>0=not present<br>?=unsure | Screenshot saved<br>1=yes<br>0=no | Test notes |
|-------------------------------------------|----------|----------------------------------------------------------------------------------------------------------------------------------------------------------------------------------------------|----------------------------------------------------------------------------------------------------------|-------------------------------------------------------------------------------------------------------------------------------------------------|------------|----------------------------------------------------|-----------------------------------|------------|
| <b>Alerts for therapeutic duplication</b> | 3.102    | <i>Medications that are the same or similar to the patient's current medications are prescribed to check for duplicate therapy alerts.</i>                                                   |                                                                                                          |                                                                                                                                                 |            |                                                    |                                   |            |
|                                           | 3.103    | <p><b>Prescribe:</b><br/>Fosinopril (Monace™)<br/>10mg tablets (30)<br/>Dose and frequency:<br/>1 tablet daily<br/>Indication:<br/>Hypertension</p> <p><b>Record</b> all alerts/messages</p> | Warning message - Therapeutic duplication (patient is already on Monoplus™ which contains fosinopril).   | Alerts are displayed when a selected medication and an entry on the medication list are:<br><br>Duplicate of same drug (same active ingredient) | DS03       | 1                                                  | 1                                 |            |
|                                           | 3.104    | <b>Cancel</b> prescribing Fosinopril 10mg (30)                                                                                                                                               |                                                                                                          |                                                                                                                                                 |            |                                                    |                                   |            |
|                                           | 3.105    | <p><b>Prescribe:</b><br/>Enalapril (Renitec™)<br/>5mg tablets (30)<br/>Dose and frequency:<br/>1 tablet daily<br/>Indication:<br/>Hypertension</p> <p><b>Record</b> all alerts/messages</p>  | Warning message - Therapeutic duplication (already on another drug in ACE inhibitor class - fosinopril). | Alerts are displayed when a selected medication and an entry on the medication list are:<br><br>Drugs within same drug class eg. ACE inhibitors | DS03       | 1                                                  | 1                                 |            |
|                                           | 3.106    | <b>Cancel</b> prescribing Enalapril 5mg (30)                                                                                                                                                 |                                                                                                          |                                                                                                                                                 |            |                                                    |                                   |            |
|                                           | 3.107    |                                                                                                                                                                                              |                                                                                                          | Total score DS03                                                                                                                                |            | 2                                                  |                                   |            |
|                                           | 3.108    |                                                                                                                                                                                              |                                                                                                          | Maximum score                                                                                                                                   |            | 2                                                  |                                   |            |
